# Supplementary material for: Towards enantioselective adsorption in surface-confined nanoporous systems
Source: Royal Society of Chemistry journal article supplement (doi:10.1039/c4cc08826c), 2014-12-05
Supplement: c4cc08826c1.pdf [file c4cc08826c1.pdf]

*Supporting information for*

**Towards enantioselective adsorption in surface-confined  
nanoporous systems**

*Elke Ghijsens,<sup>a</sup> Hai Cao,<sup>a</sup> Aya Noguchi,<sup>b</sup> Oleksandr Ivasenko,<sup>a</sup> Yuan Fang,<sup>a</sup> Kazukuni Tahara,<sup>b</sup> Yoshito Tobe<sup>b</sup> and Steven De Feyter<sup>a</sup>*

<sup>a</sup> KU Leuven, Celestijnenlaan 200F, 3001 Heverlee, Belgium.

<sup>b</sup> Division of Frontier Materials Science, Graduate School of Engineering Science, Osaka University,  
Toyonaka, Osaka 560-8531, Japan.

Contents:

1. Experimental section.
2. Induced chirality: sergeants and soldiers principle.
3. Supplementary STM images for **Fig. 2**.
4. Guest adsorption in monolayer originally formed by pure achiral or chiral DBA
5. Dynamics of enantioselective adsorption.
6. Molecular modelling
7. Guest adsorption in premixed samples with 10 mol% chiral DBA.
8. Porous networks formed by DBA-OC13 and cDBA-OC13(*R*)
9. Synthesis of cDBA-OC12(*R*).

## 1. Experimental Section

*Synthesis of the target compounds, achiral and chiral DBAs:* DBA-OC12, DBA-OC13, cDBA-OC12(*S*) and cDBA-OC13(*R*) were synthesised according to a previously reported method. (*J. Am. Chem. Soc.*, 2006, **128**, 16613–16625.; *Nat. Chem.*, 2011, **3**, 714–719.). The synthesis of cDBA-OC12(*R*) is reported in **Section 9**.

*Solution preparation:* 1-octanoic acid (Sigma-Aldrich, 99%, used as received) and 1-phenyloctane (Sigma-Aldrich, 99%, used as received) were used as solvents to dissolve the DBA molecules. The concentrations used in each experiment are specified in the following captions.

*STM measurements:* All STM experiments were performed at room temperature (20–23 °C) using a PicoSPM (Molecular imaging, now Agilent) machine operating in constant-current mode with the tip immersed in the supernatant liquid. STM tips were prepared by mechanical cutting from Pt/Ir wire (80%/20%, diameter 0.2 mm). Prior to imaging, a drop of the solution was applied onto a freshly cleaved surface of highly oriented pyrolytic graphite (HOPG, grade ZYB, Advanced Ceramics Inc., Cleveland, USA). For analysis purposes, recording of a monolayer image on HOPG was followed by consecutive imaging the graphite substrate underneath. This was done under the same experimental conditions but by lowering the substrate bias (typically  $V_{bias} = 1$  mV) and increasing the tunnelling current (typical  $I_{set} = 800$  pA). From the atomically resolved STM image of HOPG one can easily obtain the graphite symmetry axes. The images were corrected for drift via Scanning Probe Image Processor (SPIP) software (Image Metrology ApS), using the graphite lattice, allowing a more accurate unit cell

determination. From the corrected graphite images three main symmetry axes and also three reference axes (normal to main symmetry axes) can be determined. The images are low-pass filtered. The imaging parameters are indicated in the figure caption: tunneling current ( $I_{set}$ ), and sample bias ( $V_{bias}$ ).

*Data processing:* Analysis was performed by grouping images taken after a specific drop of the solution was applied to the surface. In that way approximately 10 images were grouped into what is called a session. A new session was established only after applying a new drop of the solution onto a freshly cleaved HOPG surface. Within the same scan area maximum 4 images were recorded (each at every corner). Next the images were plane corrected by using SPIP software (Image Metrology A/S).

To analyse the handedness of the dimer types and hexagons on the surface, high resolution images were recorded. Chirality can be resolved clearly when the image size is around  $70 \times 70 \text{ nm}^2$ . The honeycomb surface coverage was calculated based on 3 sessions ( $j$ ) of 10 large scale images. Because the complete dataset of images is not all of a same size a weighted mean  $\bar{P}$  and weighted standard deviation  $\sigma$  were calculated according to the following equations respectively.

After plane correcting the images, the surface area occupied by the porous structure ( $A_s$ ) was measured. Then the number of CW ( $N_{CW,ij}$ ), non-C6 ( $N_{non,ij}$ ), and CCW ( $N_{CCW,ij}$ ) hexagons in every image ( $i$ ) and in every session ( $j$ ) were counted. The error bar was calculated as a weighted standard deviation  $\sigma$  as presented in the following equations. In this way the error bar represents the variation between the different

sessions and not the error on the correctness of assigning a CW, non-C6 or CCW hexagon type.

$$\bar{P} = \frac{\sum_{j=1}^3 A_{s,j} P_{CW,j}}{\sum_{j=1}^3 \sum_{i=1}^n A_{s,ij}}$$

$$\text{with } P_{CW,j} = \frac{\sum_j^j \sum_{i=1}^n N_{CW,ij}}{\sum_j^j \sum_{i=1}^n N_{CW,ij} + \sum_j^j \sum_{i=1}^n N_{non,ij} + \sum_j^j \sum_{i=1}^n N_{CCW,ij}}$$

$$\sigma = \sqrt{\frac{\sum_{j=1}^3 A_{s,j} (P_{CW,j} - \bar{P})^2}{\sum_{j=1}^3 \sum_{i=1}^n A_{s,ij}}}$$

The guest molecules can only be well visualized at a specific state of the tip, and only high resolution images were selected for the statistics of guest adsorption, preferably images contain both CW and CCW domains. The number of nanowells being analysed are specified in each table. The error bars were calculated using the above mentioned method.

## 2. Induced chirality: sergeants and soldiers principle.

**Table S1** The mixing ratio dependent changes of CW and CCW honeycomb structures for mixtures of achiral DBA and corresponding chiral analogue.

| Identity of cDBA | 10 mol% cDBA <sup>a</sup> |            |         | 30 mol% cDBA <sup>a</sup> |            |         | 30 mol% cDBA <sup>b</sup> |            |         | 50 mol% cDBA <sup>a</sup> |            |         | 90 mol% cDBA <sup>a</sup> |            |         |
|------------------|---------------------------|------------|---------|---------------------------|------------|---------|---------------------------|------------|---------|---------------------------|------------|---------|---------------------------|------------|---------|
|                  | CW (%)                    | non-C6 (%) | CCW (%) | CW (%)                    | non-C6 (%) | CCW (%) | CW (%)                    | non-C6 (%) | CCW (%) | CW (%)                    | non-C6 (%) | CCW (%) | CW (%)                    | non-C6 (%) | CCW (%) |
| cDBA-OC12(S)     | 82±4                      | 0.8±0.1    | 17±4    | 95±3                      | 0.8±0.4    | 4±3     | -                         | -          | -       | 96±3                      | 0.8±0.5    | 3±3     | 100±1                     | 0.2±0.2    | 0±0     |
| cDBA-OC12(R)     | 22±4                      | 0.8±0.2    | 77±4    | 9±1                       | 0±0        | 91±1    | -                         | -          | -       | 4±4                       | 0.4±0.2    | 95±4    | 0±0                       | 0±0        | 100±1   |
| cDBA-OC13(R)     | 7±1                       | 3.9±2.0    | 89±3    | 8±2                       | 1.0±0.7    | 91±2    | 9±4                       | 1.6±0.1    | 90±4    | 0±0                       | 0.6±0.6    | 99±1    | 0±0                       | 0±0        | 100±0   |

a: premixed samples in 1-phenyloctane, with a total concentration of  $2.5 \times 10^{-6}$  mol/L.

b: premixed samples in 1-octanoic acid, with a total concentration of  $1 \times 10^{-6}$  mol/L.

### 3. Supplementary STM images for Fig. 2

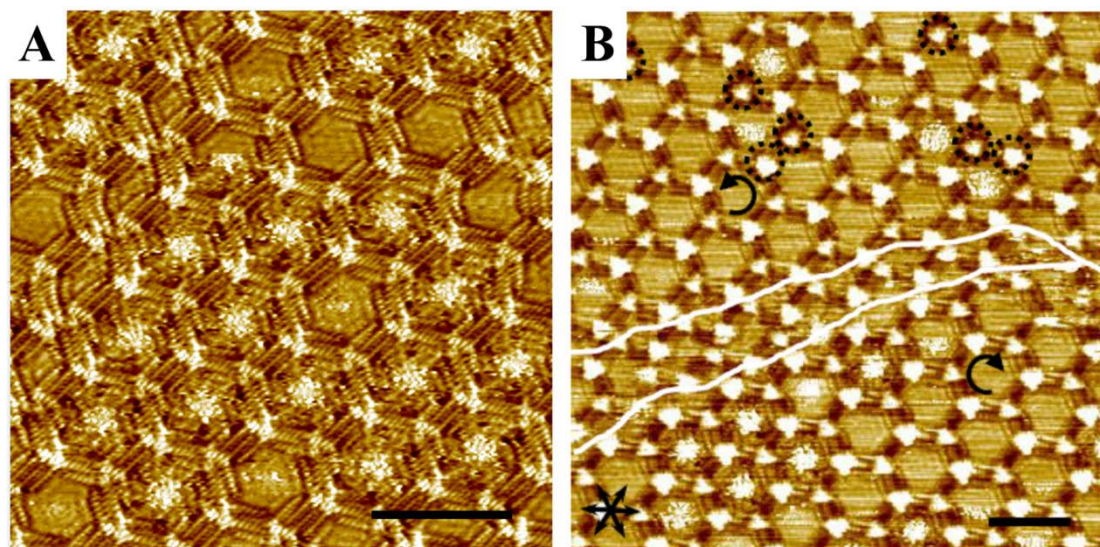

**Fig. S1** Supplementary STM images of premixed solutions containing (A) 30 mol% cDBA-OC12(*S*)/70 mol% DBA-OC12 ( $I_{set} = 200$  pA and  $V_{bias} = -250$  mV) and (B) 30 mol% cDBA-OC12(*R*)/70 mol% DBA-OC12 ( $I_{set} = 200$  pA and  $V_{bias} = -200$  mV). The white lines marks the boundary between a CCW domain and CW domain. The black arrows indicate the major symmetry axes of the HOPG surface underneath. The scale bars measure 5 nm. The black dots indicate cDBA-OC12(*R*) sergent molecules.



#### 4. Guest adsorption in monolayer originally formed by pure achiral or chiral

DBA

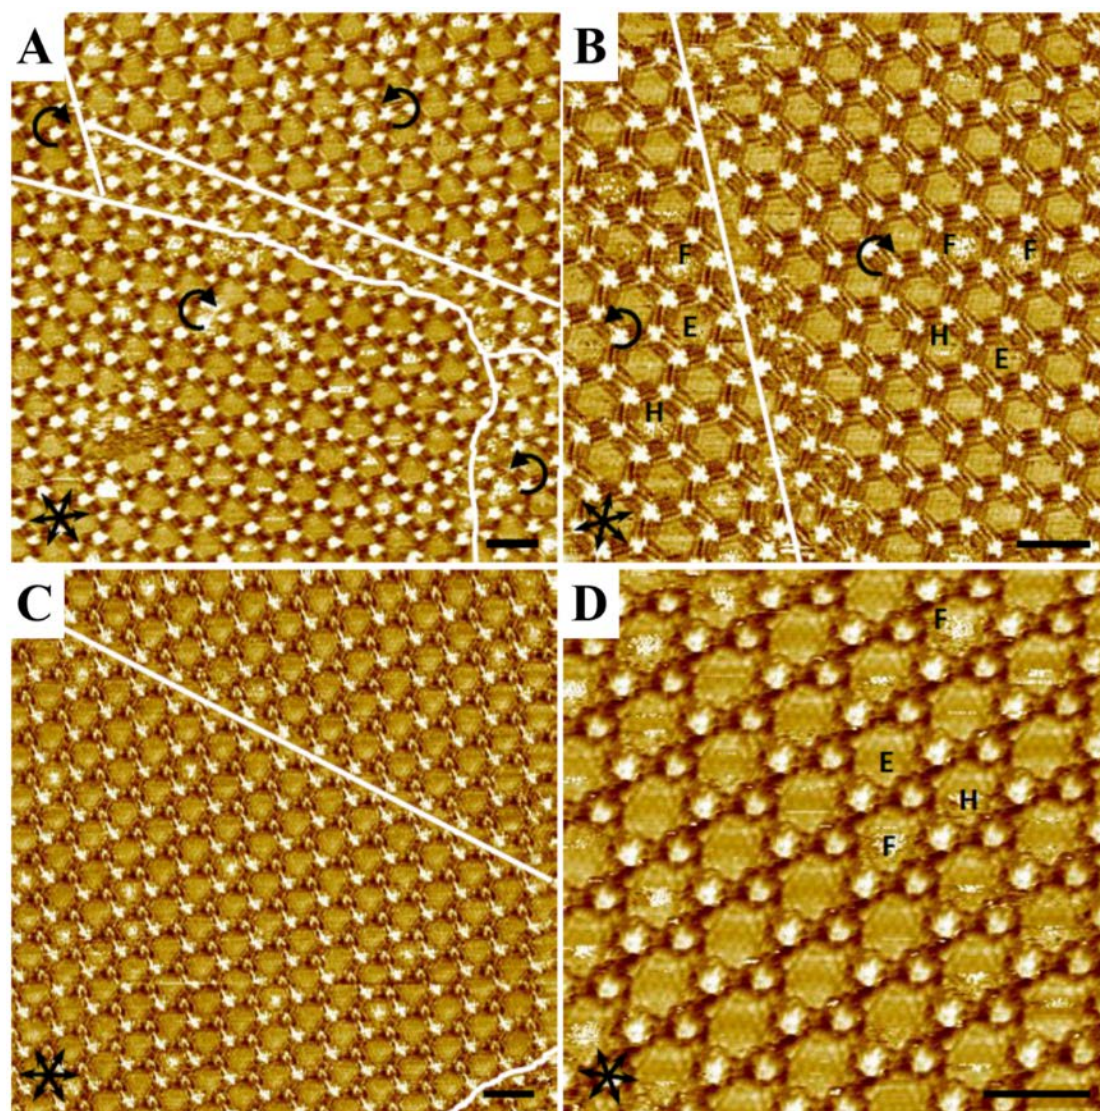

**Fig. S2** (A, B) STM-images ( $I_{set} = 200$  pA and  $V_{bias} = -200$  mV) of the self-assembled structure deposited from a solution of pure DBA-OC12 dissolved in phenyloctane with concentration  $2.5 \times 10^{-6}$  M. and (C, D) STM-images of the self-assembled structure deposited from a solution of pure cDBA-OC12(S) with concentration  $2.5 \times 10^{-6}$  M. (C) Large scale images showing small number of occupied pores ( $I_{set} = 195$  pA and  $V_{bias} = -220$  mV). (D) High resolution image ( $I_{set} = 265$  pA and  $V_{bias} = -200$  mV). Some pores in the high resolution images (B, D) were indicated as fuzzy (F), half-fuzzy (H) and empty (E). The HOPG main symmetry directions are represented by the black arrow in the left corner. The scale bars are 5 nm.

**Table S2** Characteristics of guest adsorption in the adlayer of pure DBA-OC12 and pure cDBA-OC12(*S*). ‘Total pores’ specifies the complete dataset used to calculate the occupation degree.

| <b>Pure DBA<br/>(cDBA)<br/>samples</b> | <b>DBA-OC12 (<math>2.5 \times 10^{-6}</math> M)</b> |                   |               | <b>cDBA-OC12(<i>S</i>) (<math>2.5 \times 10^{-6}</math> M)</b> |                   |               |
|----------------------------------------|-----------------------------------------------------|-------------------|---------------|----------------------------------------------------------------|-------------------|---------------|
|                                        | <b>CCW (%)</b>                                      | <b>non-C6 (%)</b> | <b>CW (%)</b> | <b>CCW (%)</b>                                                 | <b>non-C6 (%)</b> | <b>CW (%)</b> |
| <b>Total pores</b>                     | 562                                                 | 3                 | 580           | 0                                                              | 9                 | 1777          |
| <b>Incorporated</b>                    | $0 \pm 0$                                           | $0 \pm 0$         | $0 \pm 0$     | 0                                                              | $0 \pm 0$         | $0 \pm 0$     |
| <b>Fuzzy</b>                           | $14 \pm 3$                                          | $0 \pm 0$         | $16 \pm 4$    | 0                                                              | $0 \pm 0$         | $4 \pm 3$     |
| <b>Half fuzzy</b>                      | $10 \pm 2$                                          | $0 \pm 0$         | $9 \pm 4$     | 0                                                              | $0 \pm 0$         | $6 \pm 3$     |
| <b>Empty</b>                           | $76 \pm 4$                                          | $100 \pm /$       | $74 \pm 5$    | 0                                                              | $100 \pm /$       | $90 \pm 4$    |



## 5. Dynamics of enantioselective adsorption

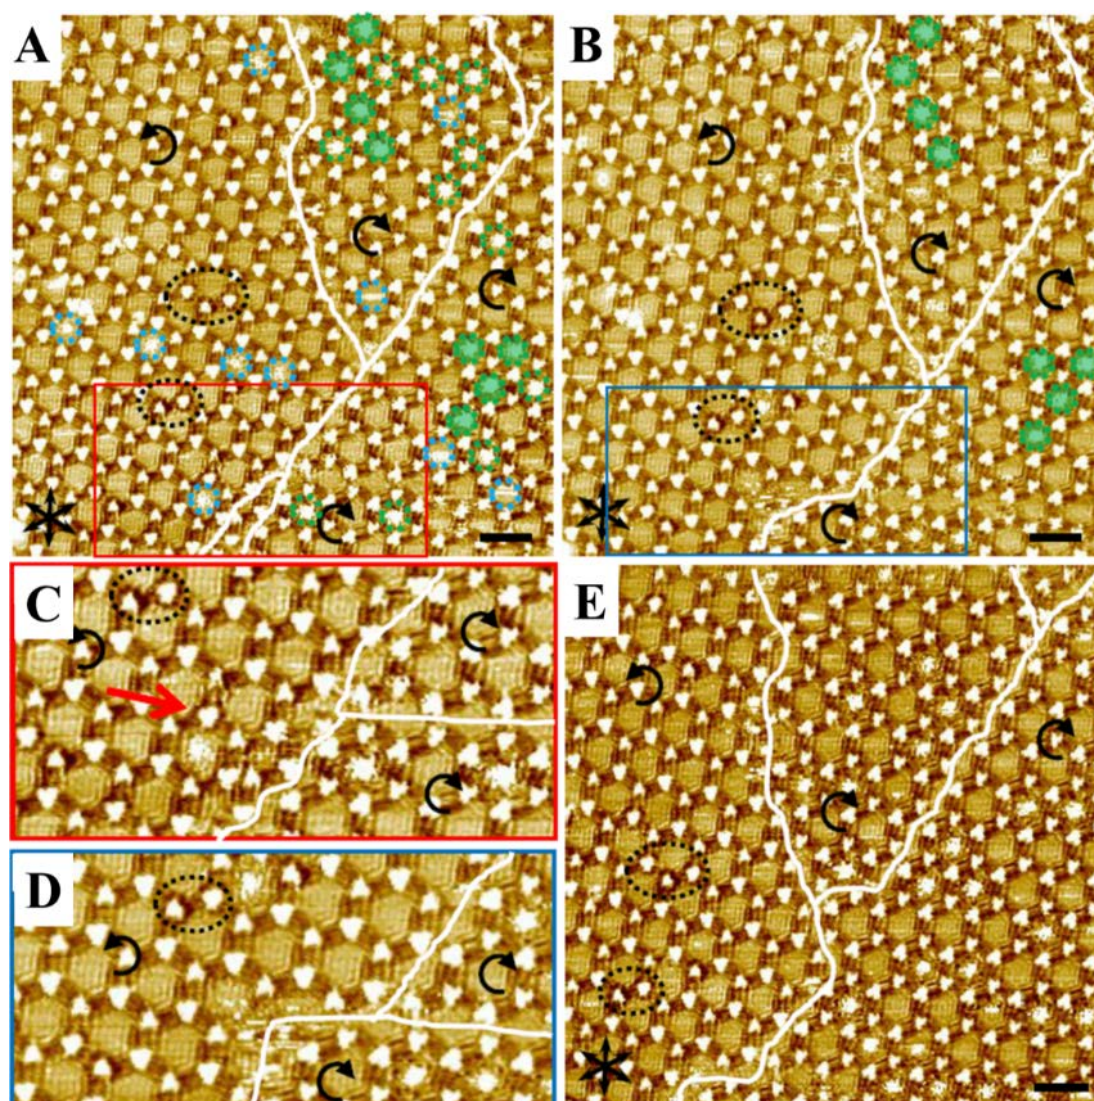

**Fig. S3** Sequential STM-images ( $I_{set} = 200$  pA and  $V_{bias} = -200$  mV) of a same area to view the dynamics of guest molecules and the chiral molecules as co-adsorbed in the adlayer network. cDBA-OC12(R) was deposited 30 min after achiral DBA-OC12. The images at relative time scales of (A) 0 min, (B) 2 min (consecutive right after image a) and (E) 7 min show no movement of the chiral DBA molecules (identified by black contour, marked with black dots) as part of the host network. (A, B) Guest molecules highlighted by green circles are defined as *incorporated*. The guests surrounded with filled circles did not move between consecutive images. Guest molecules highlighted by the blue circles appeared as *fuzzy* and *half-fuzzy*. (C, D) Enlarged areas of images A and B respectively. A chiral DBA molecule that is part of the host network nearby a domain border (pinpointed by the red arrow) gets easily desorbed. The HOPG main symmetry directions are represented by the black arrow in the left corner. The scale bars are 5 nm.

**Table S3** Characteristics of guest adsorption in the adlayer of premixed solution of 30 mol% cDBA-OC12(*S/R*) and 70 mol% DBA-OC12 by taking into account time frame of the STM-measurements. ‘Total pores’ specifies the complete dataset used to calculate the occupation degree.

| <b>Premixed samples</b> | 30 mol% cDBA-OC12( <i>S</i> ) (30 min) |                   |               | 30 mol% cDBA-OC12( <i>R</i> ) (2 h) |                   |               |
|-------------------------|----------------------------------------|-------------------|---------------|-------------------------------------|-------------------|---------------|
|                         | <u>CCW (%)</u>                         | <u>non-C6 (%)</u> | <u>CW (%)</u> | <u>CCW (%)</u>                      | <u>non-C6 (%)</u> | <u>CW (%)</u> |
| <b>Total pores</b>      | 356                                    | 5                 | 1580          | 1272                                | 13                | 116           |
| <b>Incorporated</b>     | 12 ± 8                                 | 0 ± 0             | 0 ± 0         | 0 ± 0                               | 0 ± 0             | 14 ± 1        |
| <b>Fuzzy</b>            | 6 ± 6                                  | 0 ± 0             | 9 ± 5         | 8 ± 1                               | 0 ± 0             | 6 ± 2         |
| <b>Half fuzzy</b>       | 10 ± 7                                 | 4 ± /             | 11 ± 6        | 13 ± 2                              | 23 ± 0            | 26 ± 3        |
| <b>Empty</b>            | 73 ± 8                                 | 100 ± /           | 79 ± 4        | 78 ± 5                              | 77 ± /            | 54 ± 13       |

## 6. Molecular modelling

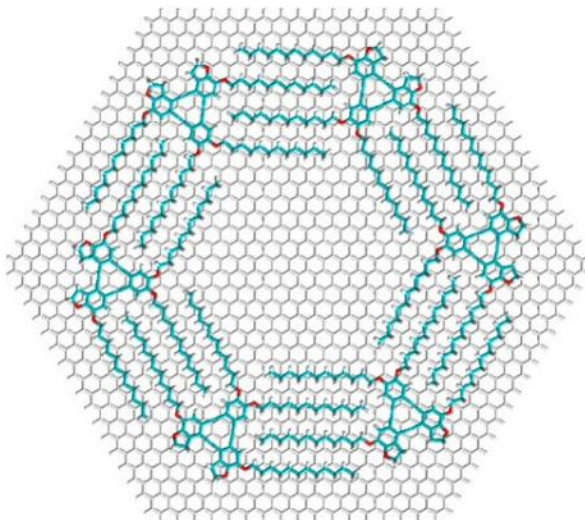

**Fig. S4** Optimized hexamers of modified DBA-OC12 on a frozen graphene flake.

All molecular mechanics calculations were performed with MM+ force field as implemented in HyperChem Prof. 7.52 (HyperChem (TM) Professional 7.52, H., Inc., 1115 NW 4th Street, Gainesville, Florida 32601, USA, 2002). Geometries were optimized to rms deviation of the energy gradient smaller than  $0.01 \text{ kcal}/(\text{mol} \cdot \text{\AA})$ . Using protocol developed and tested previously (*ACS Nano*. 2013, **7**, 8031–8042), we have designed and optimized hexamers of modified DBA-OC12 on a frozen graphene flake (**Fig. S4**). Here alkoxy chains not participating in the interactions were truncated. This allowed exclusion of undesirable fluctuations in adsorption energies due to flexibility of these chains, while still maintaining similar electronic structure and parallel orientation of the DBA core.



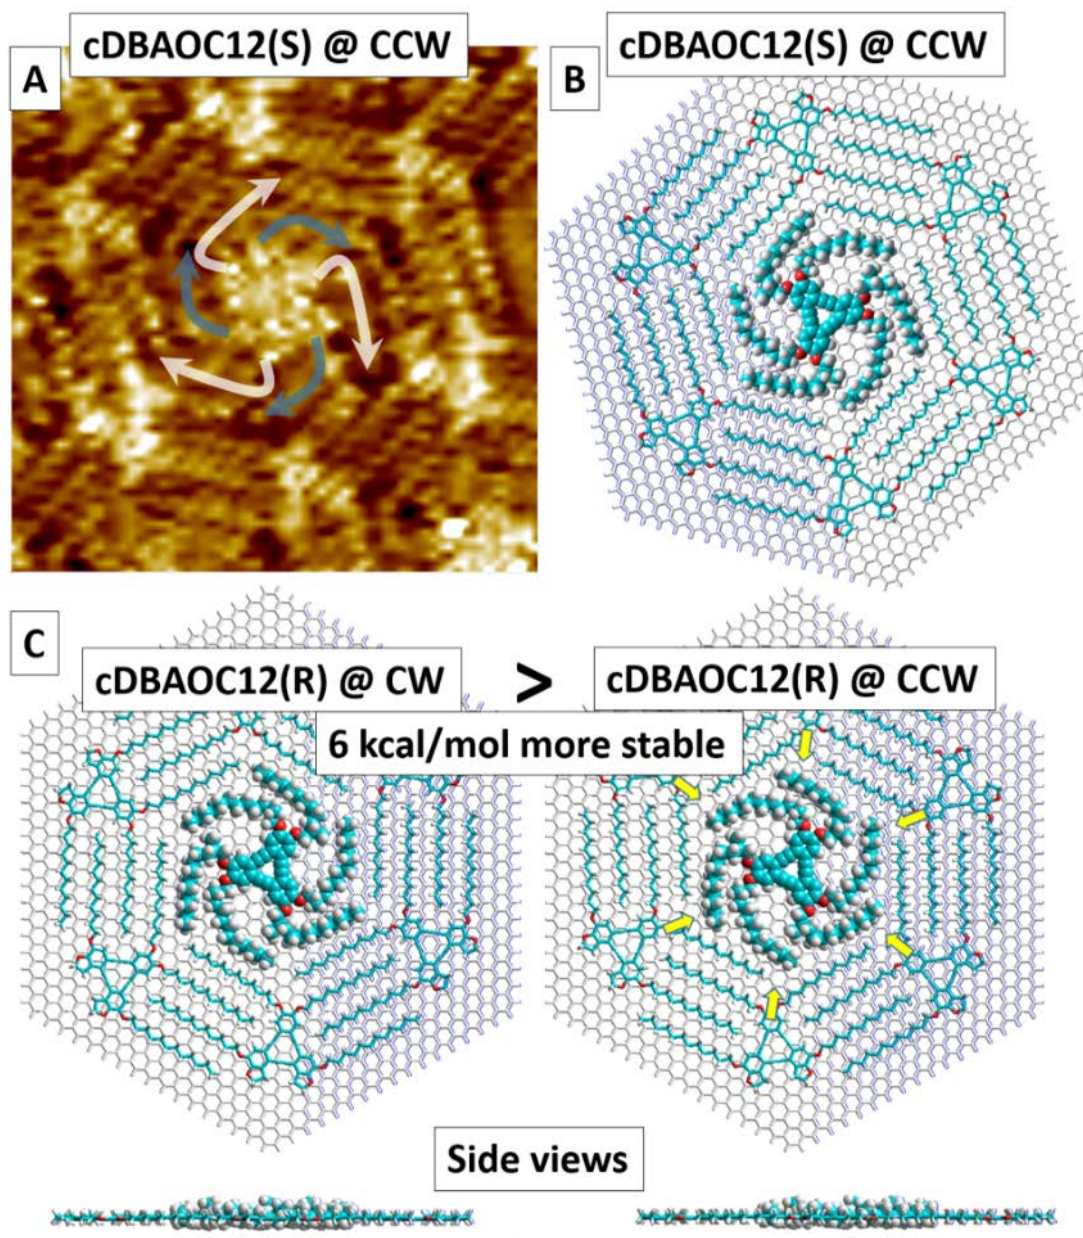

**Fig. S5** Modelling of completely confined ('incorporated') cDBA-OC12(*S/R*) guest molecules inside DBA-OC12 networks. A) STM image of an incorporated guest (Obtained from premixed solution with 30 mol% cDBA-OC12(*S*) and 70 mol% DBA-OC12) suggesting tentative bending (marked with semitransparent white and grey arrows) of its alkyl chains. This STM image, free from the arrows, can be seen in Fig. 2B of the main manuscript. B) MM-optimized molecular model of cDBA-OC12(*S*) inside DBA-OC12 hexamer. C) Optimized molecular geometry and energy difference of two host-guest complexes. Here, yellow arrows point to the regions where the alkyl chains of the guest (cDBA-OC12(*R*)) do not have efficient van der Waals contacts with the alkyl chains of the CCW pore. Corresponding contacts are present in the case of cDBA-OC12(*R*)@CW host-guest complex and constitute the primary reason for its higher stability compared to cDBA-OC12(*R*)@CCW complex.

To model guest molecules completely confined (incorporated) within DBA pores we have tested several conformations and found that the lowest energy geometry features bent alkyl chains (**Fig. S5A**) with stereogenic methyl groups pointing up from the substrate to avoid the steric repulsion with substrate (**Fig. S5B**). Optimization of the chiral guests inside CW and CCW pores show some enantioselectivity. For example, cDBA-OC12(*R*) prefers to adsorb within CW pores of DBAOC12 net (**Fig. S5C**).

## 7. Guest adsorption in premixed samples with 10 mol% chiral DBA

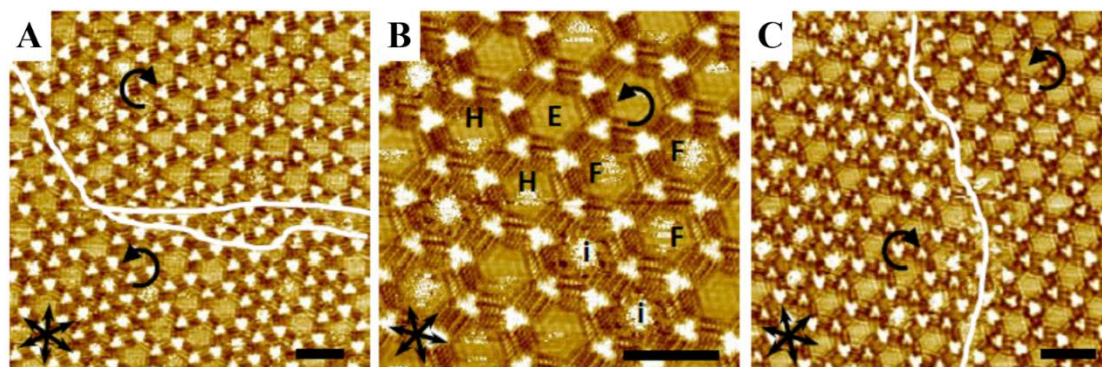

**Fig. S6** STM-images of premixed solutions containing 10 mol% chiral DBA. (A) Large scale image ( $I_{set} = 180$  pA and  $V_{bias} = -200$  mV) of the adlayer adsorbed from a solution containing cDBA-OC12(S). (B) High resolution image ( $I_{set} = 200$  pA and  $V_{bias} = -250$  mV) of a CCW domain. Some occupied pores are assigned as half-fuzzy (H), fuzzy (F) and incorporated (I). The empty pores are pinpointed with the letter E. (C) Large scale image ( $I_{set} = 200$  pA and  $V_{bias} = -200$  mV) of the adlayer adsorbed from a solution containing cDBA-OC12(R). The HOPG main symmetry directions are represented by the black arrow in the left corner. The scale bars are 5 nm.

**Table S4** Characteristics of guest adsorption in the adlayer of 1:9 (10 mol% cDBA) premixed solution of cDBA-OC12(*S/R*) and DBA-OC12. ‘Total pores’ specifies the complete dataset used to calculate the occupation degree.

| <b>Premixed samples</b> | 10 mol% cDBA-OC12( <i>S</i> ) |                   |               | 10 mol% cDBA-OC12( <i>R</i> ) |                   |               |
|-------------------------|-------------------------------|-------------------|---------------|-------------------------------|-------------------|---------------|
|                         | <u>CCW (%)</u>                | <u>non-C6 (%)</u> | <u>CW (%)</u> | <u>CCW (%)</u>                | <u>non-C6 (%)</u> | <u>CW (%)</u> |
| <b>Total pores</b>      | 591                           | 28                | 3075          | 2413                          | 16                | 945           |
| <b>Incorporated</b>     | 33 ± 1                        | 0 ± 0             | 1 ± 0         | 3 ± 1                         | 0 ± 0             | 10 ± 2        |
| <b>Fuzzy</b>            | 6 ± 3                         | 0 ± 0             | 15 ± 3        | 9 ± 2                         | 0 ± 0             | 17 ± 7        |
| <b>Half fuzzy</b>       | 4 ± 2                         | 4 ± /             | 5 ± 2         | 8 ± 1                         | 0 ± 0             | 8 ± 1         |
| <b>Empty</b>            | 57 ± 3                        | 96 ± /            | 79 ± 1        | 81 ± 2                        | 100 ± /           | 65 ± 7        |



## 8. Porous networks formed by DBA-OC13 and cDBA-OC13(R)

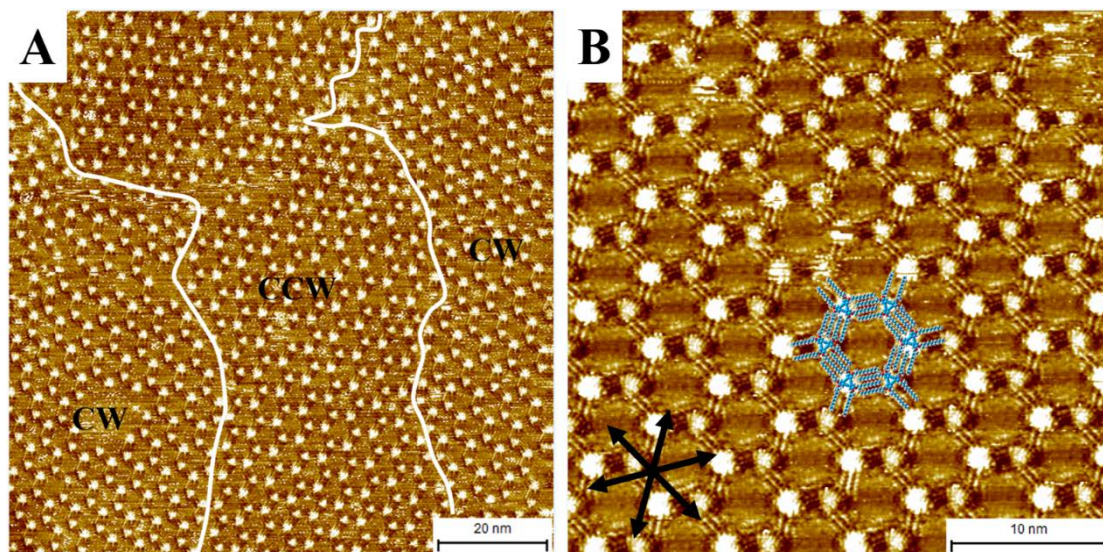

**Fig. S7** STM images of (A) DBA-OC13 ( $1 \times 10^{-6}$  M,  $I_{set} = 280$  pA and  $V_{bias} = -230$  mV) and (B) cDBA-OC13(R) ( $1 \times 10^{-6}$  M,  $I_{set} = 280$  pA and  $V_{bias} = -230$  mV) at the 1-octanoic acid/HOPG interfaces. For chiral DBA, only CCW nanowells were obtained. The white lines marks the boundary between a CCW domain and CW domain. The black arrows indicate the major symmetry axes of the HOPG surface underneath.

## 9. Synthesis of cDBA-OC12(*R*).

**General.** All manipulations were performed in an inert gas (nitrogen or argon) atmosphere. All solvents were distilled before use. All commercially available reagents were used as received.

$^1\text{H}$  (400 MHz) and  $^{13}\text{C}$  (100 MHz) NMR spectra were measured on a Bruker UltraShield Plus 400 spectrometer. When chloroform-*d* was used as solvent, the spectra were referenced to residual solvent proton signals in the  $^1\text{H}$  NMR spectra (7.26 ppm) and to the solvent carbons in the  $^{13}\text{C}$  NMR spectra (77.0 ppm). Other spectra were recorded by the use of the following instruments: IR spectra, JACSCO FT/IR-410; mass spectra, JEOL JMS-700 for EI or FAB ionization mode.

### Scheme S1 Synthesis of cDBA-OC12(*R*).

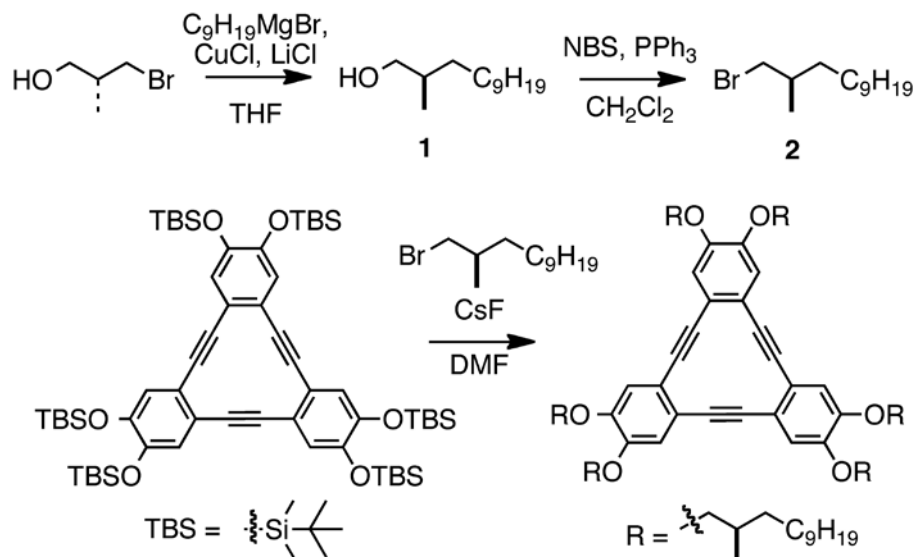

**Synthesis of (*R*)-2-Methyldodecan-1-ol (1).** To a suspension of magnesium (957 mg, 39.4 mmol) in THF (12.0 mL), 1-bromononane (4.08 g, 19.7 mmol) was added dropwise via a syringe. After stirring for 2 h at room temperature, prepared Grignard reagent was transferred to another reaction vessel via a cannula. The reaction vessel

was cooled in an ice bath. A solution of CuCl<sub>2</sub> (334 mg, 2.49 mmol) and LiCl (217 mg, 5.12 mmol) in THF (5.0 mL) was added to the mixture. Then, a solution of (*S*)-3-bromo-2-methyl-1-propanol (504 mg, 3.29 mmol) in THF (1.1 mL) was added to the mixture. After stirring at 50 °C for 19 h, the reaction was quenched by the addition of saturated solution of NH<sub>4</sub>Cl aq. (2 mL) and water. The products were extracted with ether, and the extract was washed with an aqueous solution of NH<sub>3</sub> (ca. 5%) and brine. The extract was dried over MgSO<sub>4</sub>. After removal of the solvents under vacuum, the crude mixture was subjected to a silica gel column (hexane/AcOEt = 8/1) to give **1** (444 mg, 67%) as a colorless oil. <sup>1</sup>H NMR (400 MHz, CDCl<sub>3</sub>, 30 °C) δ 3.54–3.49 (m, 1H), 3.46–3.37 (m, 1H), 1.67–1.56 (m, 1H), 1.46–1.01 (m, 18H), 0.97–0.77 (m, 6H); <sup>13</sup>C NMR (100 MHz, CDCl<sub>3</sub>, 30 °C) δ 68.4, 35.8, 33.2, 31.9, 29.9, 29.7, 29.6, 29.3, 27.0, 22.7, 16.6, 14.1; IR (neat) 3334, 2956, 2925, 2854, 1466, 1378, 1041, 721 cm<sup>-1</sup>; MS (EI): *m/z* = 182 ([M–H<sub>2</sub>O]<sup>+</sup>).

**Synthesis of (*R*)-1-Bromo-2-methyldodecane (2).** To a solution of **2** (40.9 mg, 204 μmol) in CH<sub>2</sub>Cl<sub>2</sub> (0.6 mL) at 0 °C, PPh<sub>3</sub> (80.8 mg, 308 μmol) and *N*-bromosuccinimide (NBS, 55.3 mg, 311 μmol) were added. After stirring at room temperature for 30 min, the solvent was removed under vacuum. The products were separated with a silica gel column (hexane) to afford **2** (48.6 mg, 91%) as a colorless oil. <sup>1</sup>H NMR (400 MHz, CDCl<sub>3</sub>, 30 °C) δ 3.40 (dd, *J* = 9.6, 5.0 Hz, 1H), 3.32 (dd, *J* = 9.6, 6.0 Hz, 1H), 1.87–1.70 (m, 1H), 1.50–1.11 (m, 18H), 1.01 (d, *J* = 6.4 Hz, 3H), 0.88 (t, *J* = 6.8 Hz, 3H); <sup>13</sup>C NMR (100 MHz, CDCl<sub>3</sub>, 30 °C) δ 41.5, 35.2, 34.9, 31.9, 29.7, 29.61, 29.58, 29.3,

26.9, 22.7, 18.8, 14.1; IR (neat) 2957, 2925, 2854, 1464, 1378, 1229, 939, 820, 721, 653, 622  $\text{cm}^{-1}$ ; HRMS (EI):  $m/z$  calcd for  $\text{C}_{13}\text{H}_{27}^{81}\text{Br}$  ( $\text{M}^+$ ) 264.1276, Found: 264.1266.

**Synthesis of cDBA-OC12(R).** *Tert*-Butyldimethylsilyl protected hexahydroxy DBA (21.5 mg, 19.9  $\mu\text{mol}$ ) was dissolved in DMF (0.5 mL). To the solution, CsF (46.3 mg, 305  $\mu\text{mol}$ ) and a solution of **2** (91.7 mg, 348  $\mu\text{mol}$ ) in DMF (1.5 mL) were added at room temperature. After stirring at 80  $^{\circ}\text{C}$  for 3 h, the solvent was removed under vacuum. The residue was subjected to silica gel column chromatography (hexane/ $\text{CH}_2\text{Cl}_2$  = from 60/1 to 6/1) to give **cDBA-OC12(R)** (14.1 mg, 48%) as a yellow oil.  $^1\text{H}$  NMR (400 MHz,  $\text{CDCl}_3$ , 30  $^{\circ}\text{C}$ )  $\delta$  6.70 (s, 1H), 3.79 (dd,  $J$  = 8.8, 6.0 Hz, 6H), 3.72 (dd,  $J$  = 8.8, 6.8 Hz, 6H), 2.10–1.87 (m, 6H), 1.52–1.16 (m, 108H), 1.02 (d,  $J$  = 6.8 Hz, 18H), 0.88 (t,  $J$  = 6.8 Hz, 18H);  $^{13}\text{C}$  NMR (100 MHz,  $\text{CDCl}_3$ , 30  $^{\circ}\text{C}$ )  $\delta$  149.4, 119.7, 115.7, 91.9, 74.0, 33.5, 33.2, 31.9, 29.9, 29.71, 29.65, 29.4, 27.0, 22.7, 17.0, 14.1; IR (KBr) 3082, 2953, 2923, 2852, 2206, 1693, 1593, 1550, 1529, 1510, 1467, 1414, 1377, 1354, 1259, 1228, 1070, 1014, 926, 887, 855, 799, 723  $\text{cm}^{-1}$ ; HRMS (FAB):  $m/z$  calcd for  $\text{C}_{102}\text{H}_{168}\text{O}_6$  ( $\text{M}^+$ ) 1489.2841, Found: 1489.2848.
